# Supplementary material for: Nanostructured Lipid Carrier Gel Formulation of Recombinant Human Thrombomodulin Improve Diabetic Wound Healing by Topical Administration
Source: MDPI journal article supplement (doi:10.3390/pharmaceutics13091386), 2021-09-02
Supplement: s1 [file s1]

## Supplementary figures and tables

**Table S1.** Characteristics of NLC formulations

| Solid lipid / Oil | Solid lipid :<br>oil | Particle size (nm) | PDI          | Zeta potential (mV) | Sample<br>size |
|-------------------|----------------------|--------------------|--------------|---------------------|----------------|
| ATO5/Miglyol      | 8 : 2                | 360.4 ± 98.2       | 0.578 ± 0.31 | -39.2 ± 4.4         | 3              |
| ATO5/Miglyol      | 7 : 3                | 233.0 ± 38.1       | 0.309 ± 0.12 | -39.2 ± 3.6         | 3              |
| ATO5/Miglyol      | 6 : 4                | 224.0 ± 20.0       | 0.292 ± 0.09 | -39.5 ± 0.9         | 3              |
| ATO5/Miglyol      | 5 : 5                | 223.6 ± 17.9       | 0.268 ± 0.05 | -41.0 ± 5.8         | 11             |
| ATO5/Miglyol      | 4 : 6                | 357.2 ± 85.7       | 0.378 ± 0.06 | -45.2 ± 4.4         | 3              |
| ATO5/Captex       | 8 : 2                | 188.2 ± 5.2        | 0.231 ± 0.01 | -39.9 ± 0.9         | 3              |
| ATO5/Captex       | 7 : 3                | 186.9 ± 0.8        | 0.229 ± 0.01 | -40.2 ± 1.2         | 3              |
| ATO5/Captex       | 6 : 4                | 199.0 ± 10.4       | 0.247 ± 0.01 | -41.7 ± 1.7         | 3              |
| ATO5/Captex       | 5 : 5                | 237.7 ± 27.3       | 0.314 ± 0.05 | -38.6 ± 5.8         | 6              |
| ATO5/Captex       | 4 : 6                | 292.5 ± 7.1        | 0.332 ± 0.04 | -44.1 ± 2.4         | 3              |
| Geleol/Miglyol    | 8 : 2                | 407.9 ± 59.1       | 0.720 ± 0.01 | -29.1 ± 4.2         | 3              |
| Geleol/Miglyol    | 7 : 3                | 299.6 ± 74.2       | 0.583 ± 0.18 | -30.4 ± 1.8         | 3              |
| Geleol/Miglyol    | 6 : 4                | 224.5 ± 31.5       | 0.486 ± 0.07 | -30.4 ± 1.9         | 3              |
| Geleol/Miglyol    | 5 : 5                | 154.2 ± 23.6       | 0.308 ± 0.02 | -34.3 ± 3.5         | 5              |
| Geleol/Miglyol    | 4 : 6                | 148.7 ± 6.6        | 0.267 ± 0.01 | -34.1 ± 1.4         | 3              |
| Geleol/Captex     | 8 : 2                | 295.1 ± 127.5      | 0.548 ± 0.29 | -24.7 ± 2.1         | 3              |
| Geleol/Captex     | 7 : 3                | 316.5 ± 20.2       | 0.606 ± 0.03 | -25.7 ± 2.0         | 3              |
| Geleol/Captex     | 6 : 4                | 241.9 ± 24.9       | 0.484 ± 0.04 | -26.3 ± 1.5         | 3              |
| Geleol/Captex     | 5 : 5                | 155.8 ± 11.4       | 0.235 ± 0.01 | -29.4 ± 3.2         | 5              |
| Geleol/Captex     | 4 : 6                | 163.3 ± 8.5        | 0.207 ± 0.01 | -35.9 ± 4.4         | 3              |

Particle size (nm)

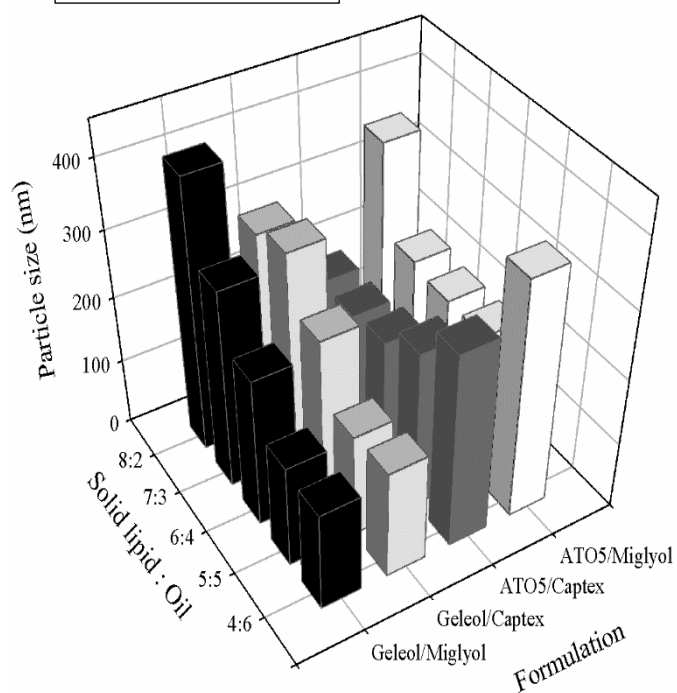

PDI

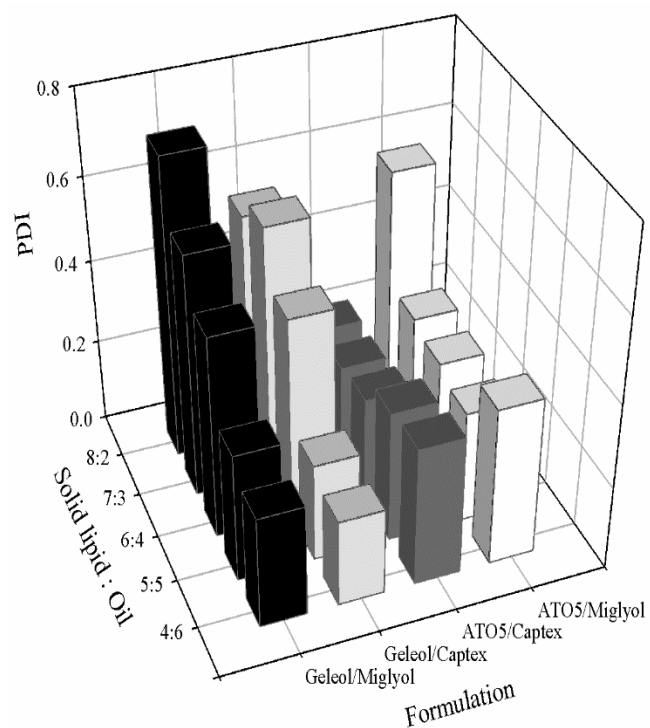

Zeta potential (mV)

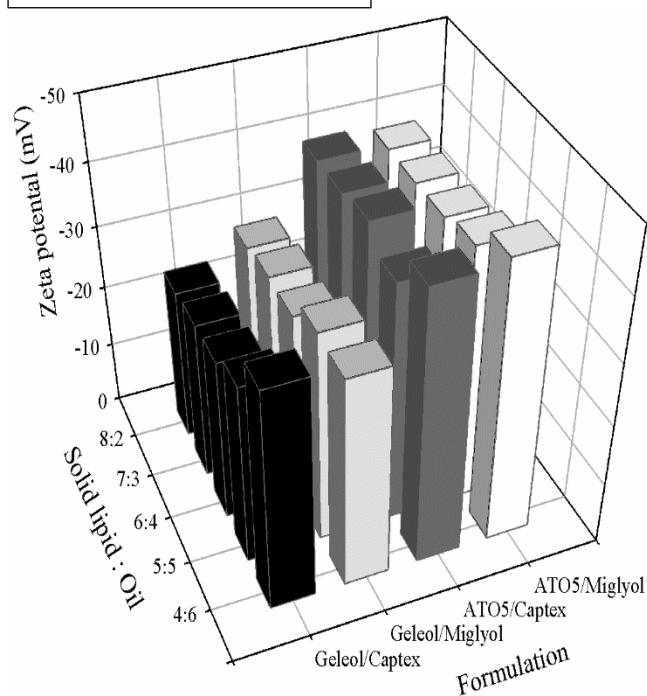

**Figure S1.** Characteristics of NLC formulations in 3D bar graph.

**Table S2.** Characteristics of NLC formulations

| Drug content (µg) | Solid lipid / Oil | Solid lipid : oil | Particle size (nm) | PDI          | Zeta potential (mV) | Sample size |
|-------------------|-------------------|-------------------|--------------------|--------------|---------------------|-------------|
| --                | ATO5/Miglyol      | 5 : 5             | 223.6 ± 17.9       | 0.268 ± 0.05 | -41.0 ± 5.8         | 11          |
| 120               | ATO5/Miglyol      | 5 : 5             | 220.2 ± 12.3       | 0.238 ± 0.04 | -43.1 ± 0.9         | 3           |
| --                | ATO5/Captex       | 5 : 5             | 237.7 ± 27.3       | 0.314 ± 0.05 | -38.6 ± 5.3         | 6           |
| 120               | ATO5/Captex       | 5 : 5             | 182.3              | 0.230        | -37.1               | 2           |
| --                | Geleol/Miglyol    | 5 : 5             | 154.2 ± 23.6       | 0.308 ± 0.02 | -34.3 ± 3.5         | 5           |
| 120               | Geleol/Miglyol    | 5 : 5             | 144.9              | 0.314        | -27.2               | 2           |
| --                | Geleol /Captex    | 5 : 5             | 155.8 ± 11.4       | 0.235 ± 0.01 | -29.4 ± 3.2         | 5           |
| 120               | Geleol /Captex    | 5 : 5             | 163.3              | 0.249        | -32.4               | 2           |

**Table S3.** Encapsulation efficiency of rhTM in NLC

| Formulation | Free form rhTM (%) | Encapsulation efficiency (%) |
|-------------|--------------------|------------------------------|
| AM          | 6.5 ± 1.0          | 93.5 ± 1.0                   |
| AC          | 4.8 ± 1.8          | 95.2 ± 1.8                   |
| GM          | 7.9 ± 4.8          | 92.1 ± 4.8                   |
| GC          | 6.5 ± 2.3          | 93.5 ± 2.3                   |

A: ATO5

G: Geleol

M: Miglyol

C: Captex

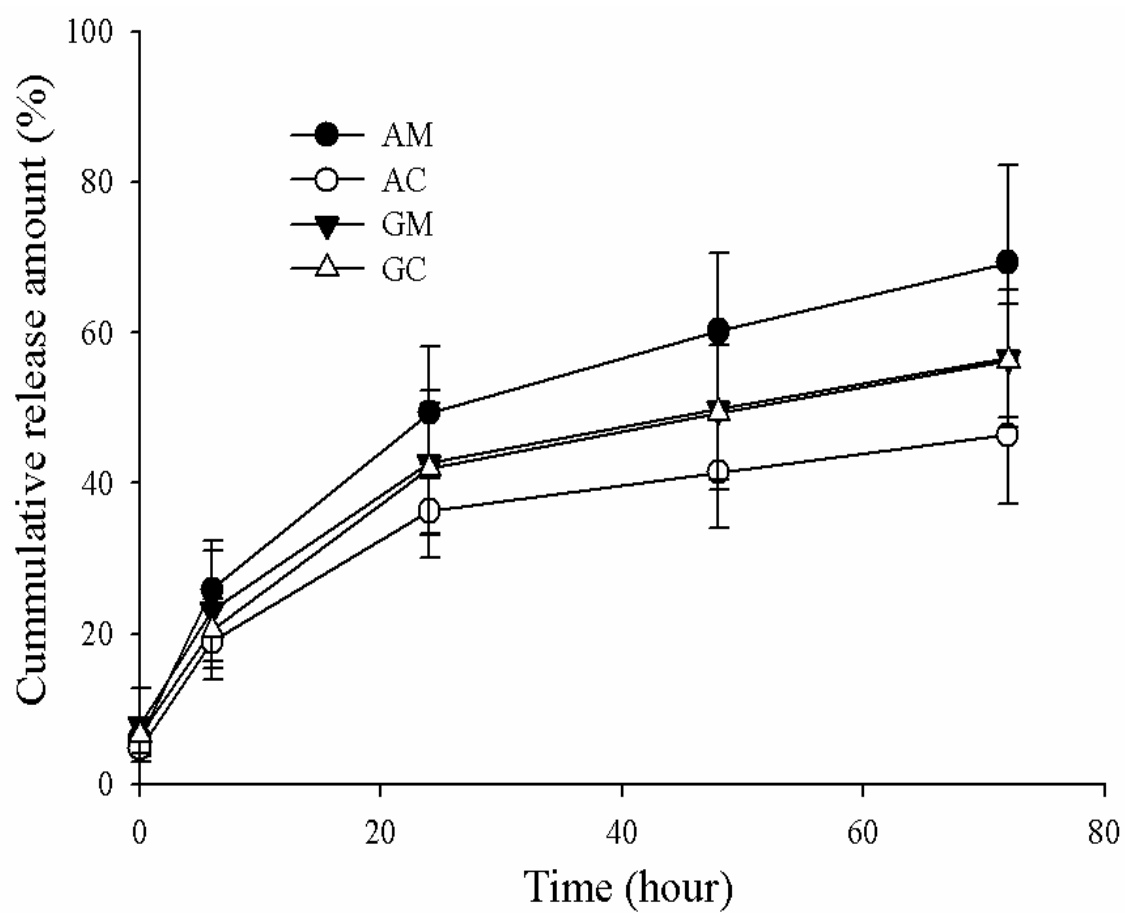

**Figure S2.** RhTM release profile from NLC formulations. Highest release of rhTM from AM-NLC among the 4 formulations

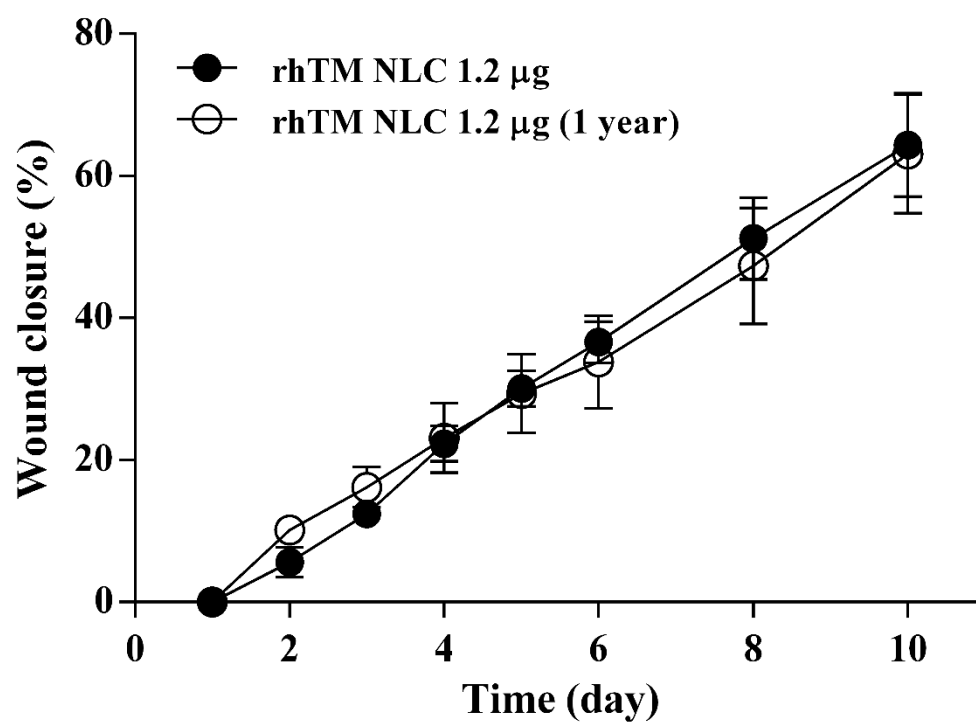

**Figure S3.** Wound closure % of rhTM NLC 1.2 µg after 1 year of storage at 4°C versus freshly prepared.
